# Supplementary material for: Cell-Free HPV DNA Provides an Accurate and Rapid Diagnosis of HPV-Associated Head and Neck Cancer
Source: Oxford University Press journal article supplement (doi:10.1158/1078-0432.ccr-21-3151), 2021-11-29
Supplement: ccr-21-3151_supplementary_tables_supp0.docx [file ccr-21-3151_supplementary_tables_supp0.docx]

**Supplemental Tables**

**Supplemental Table 1.** HPV diagnostic tests used for tissue and FNA testing

**Supplemental Table 2.** Amplicon sequences

**Supplemental Table 3.** Separate file

**Supplemental Table 4.** Cross-sectional Imaging features.

**Supplemental Table 5.** HPV ddPCR assays do not cross-react

**Supplemental Table 6.** ddPCR limit of detection assays using concentration - events
